# Supplementary material for: Drivers of Collembola assemblages along an altitudinal gradient in northeast China
Source: PubMed Central journal article supplement (PMC8840876; doi:10.1002/ece3.8559), 2022-02-12
Supplement: ECE3-12-e8559-s002.pdf [file ECE3-12-e8559-s002.pdf]

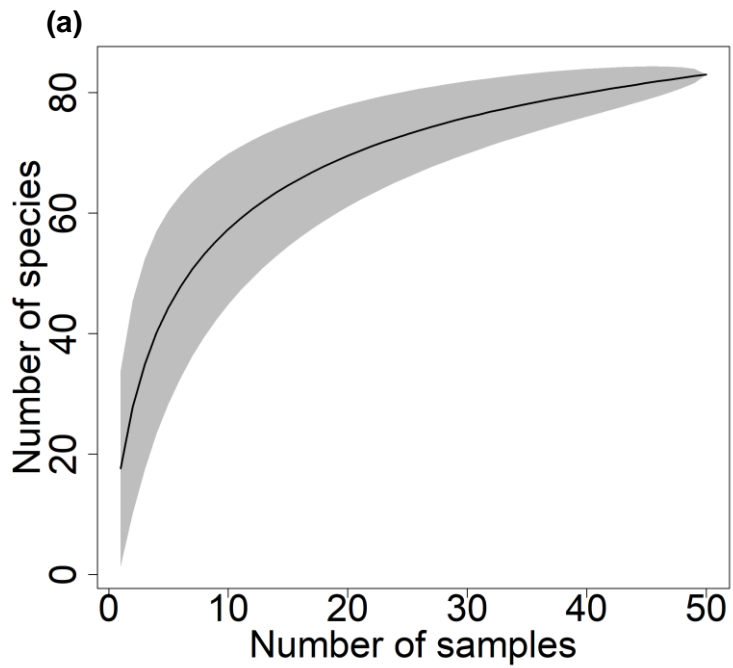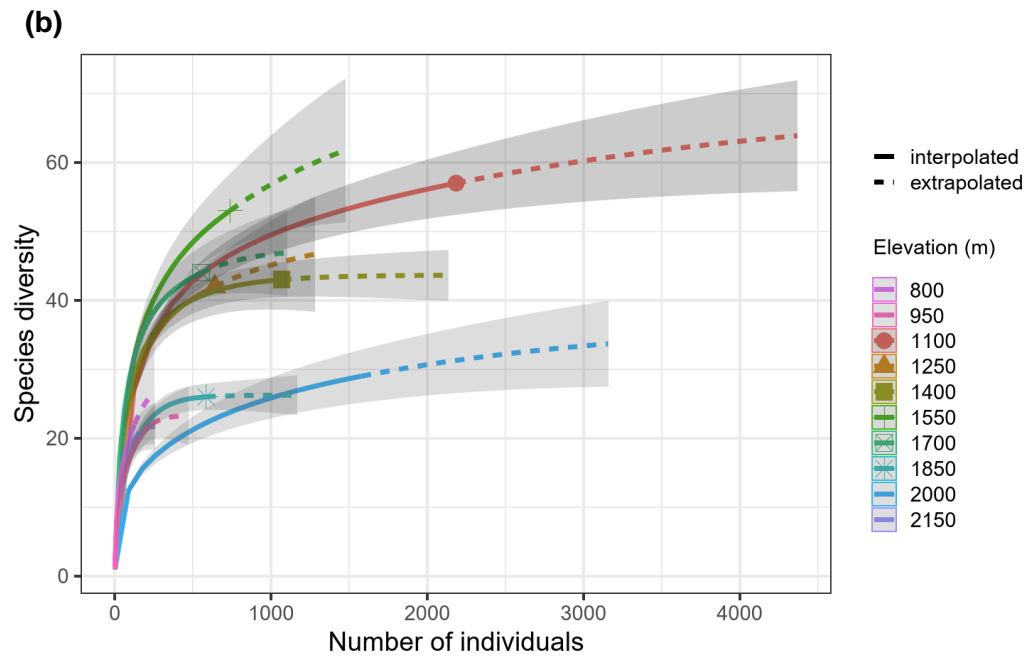

**Figure S1.**

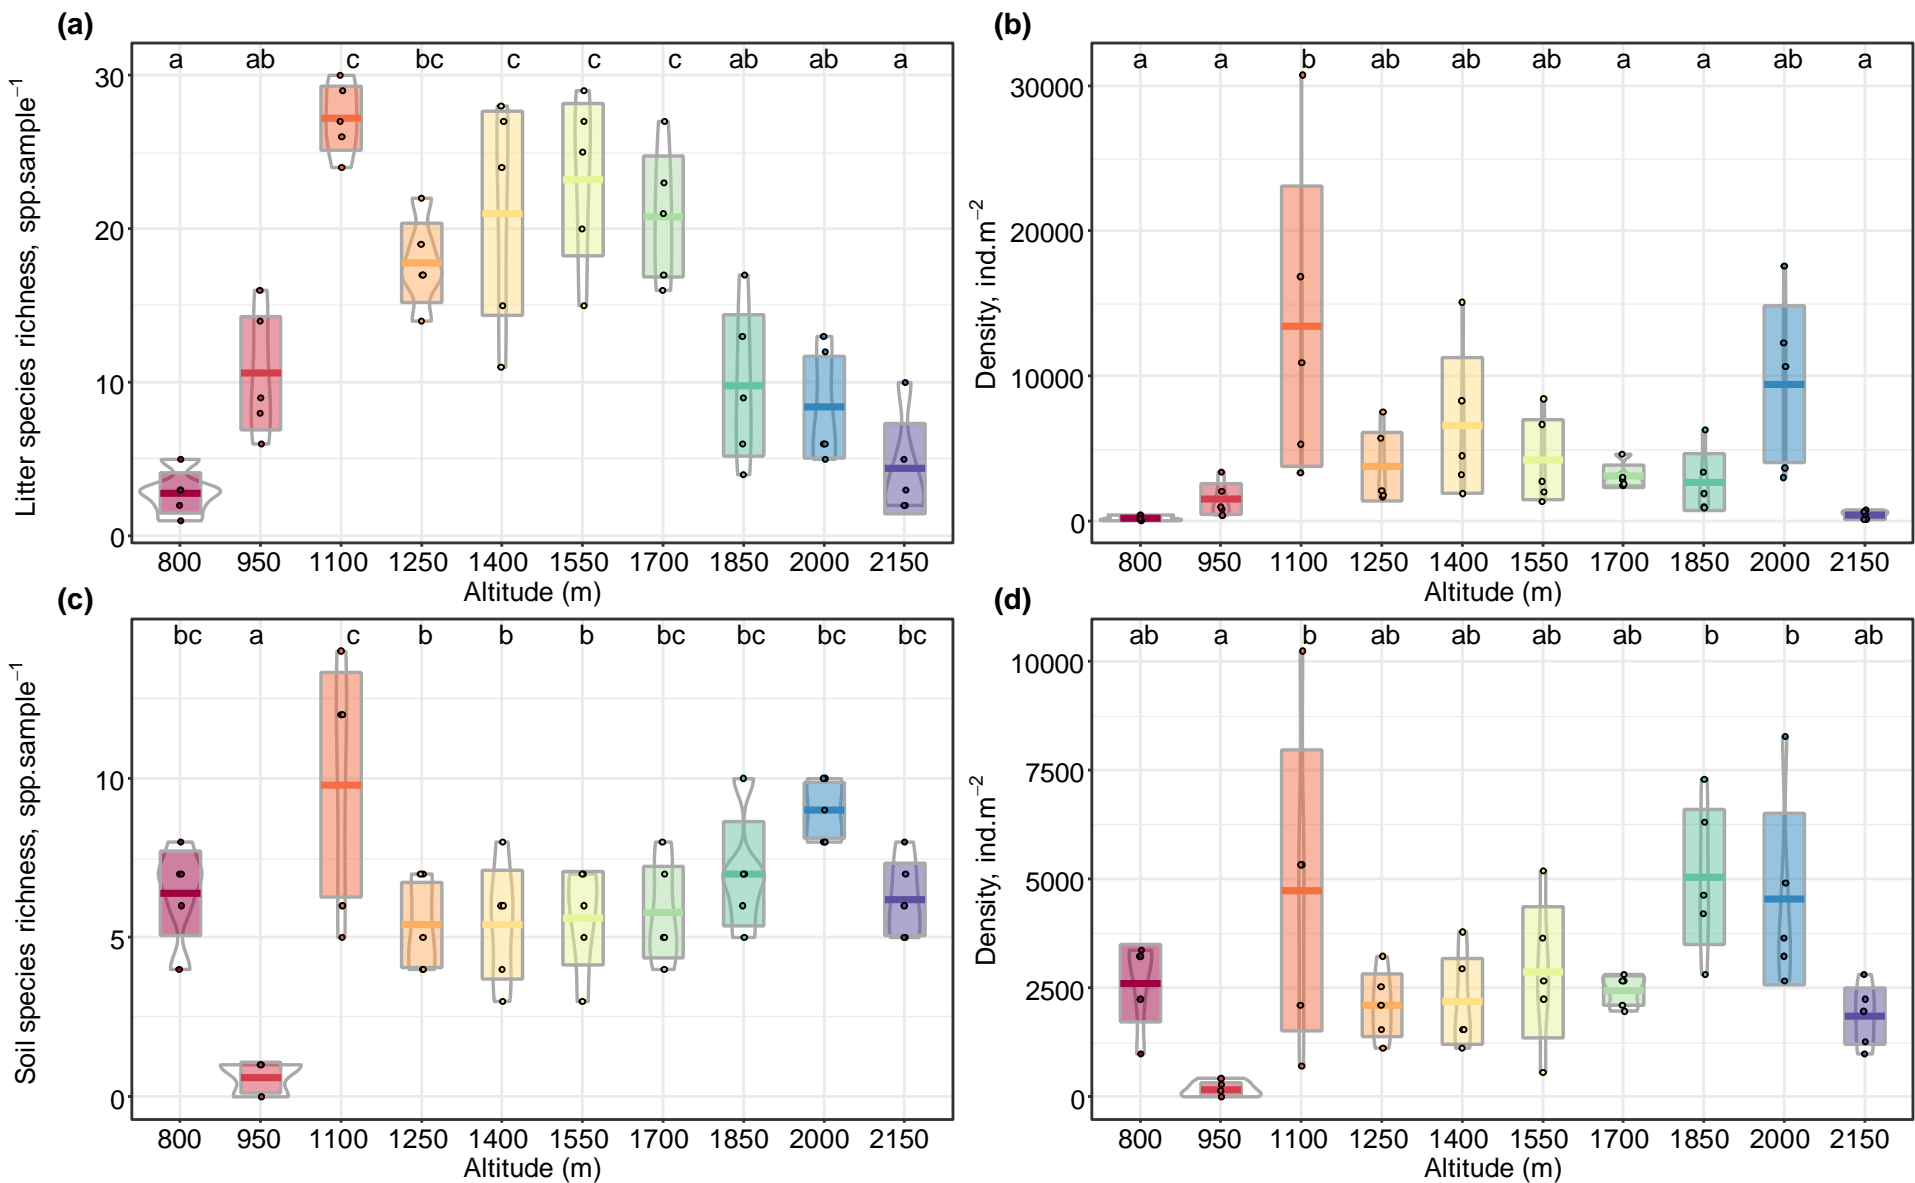

**Figure S2.**

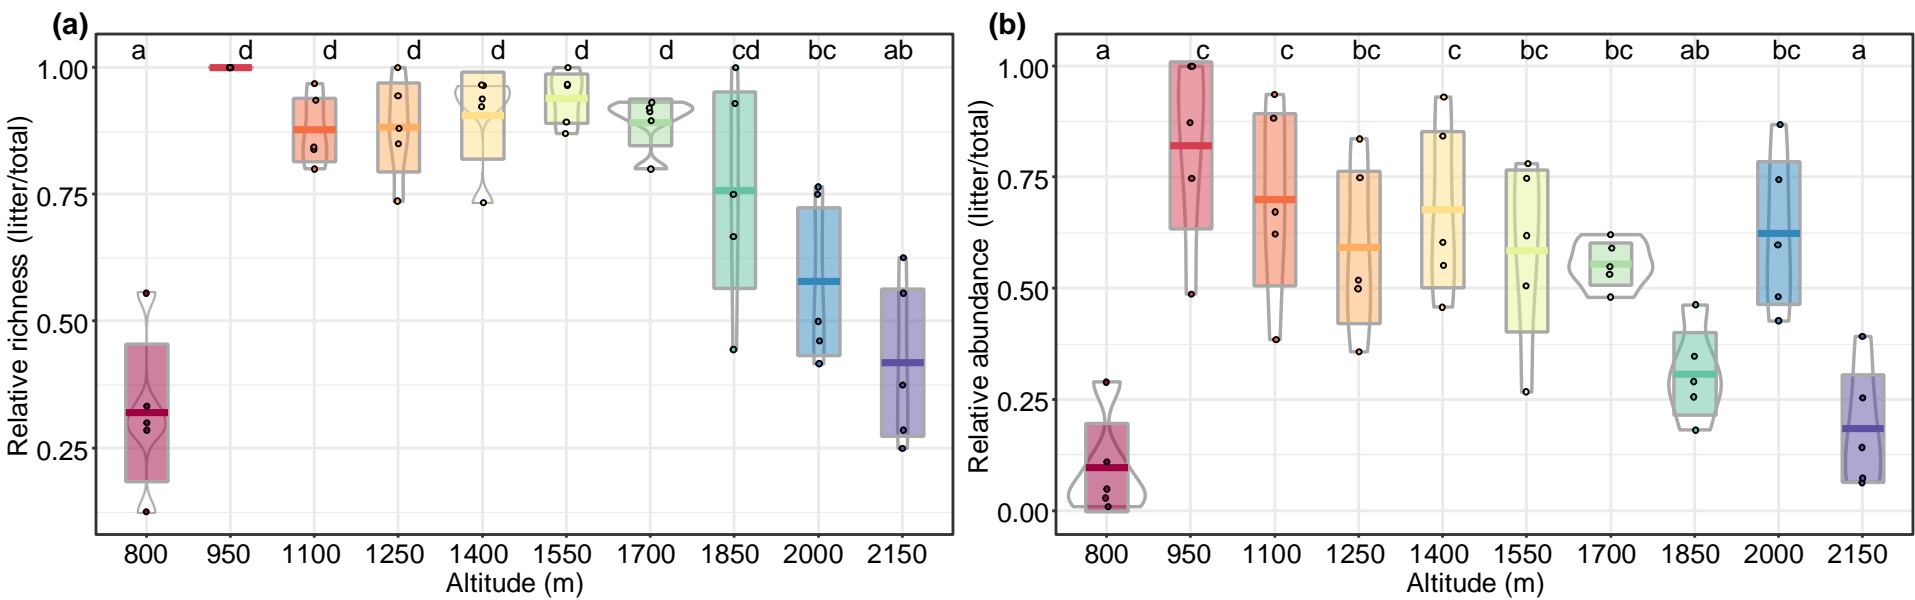

**Figure S3.**

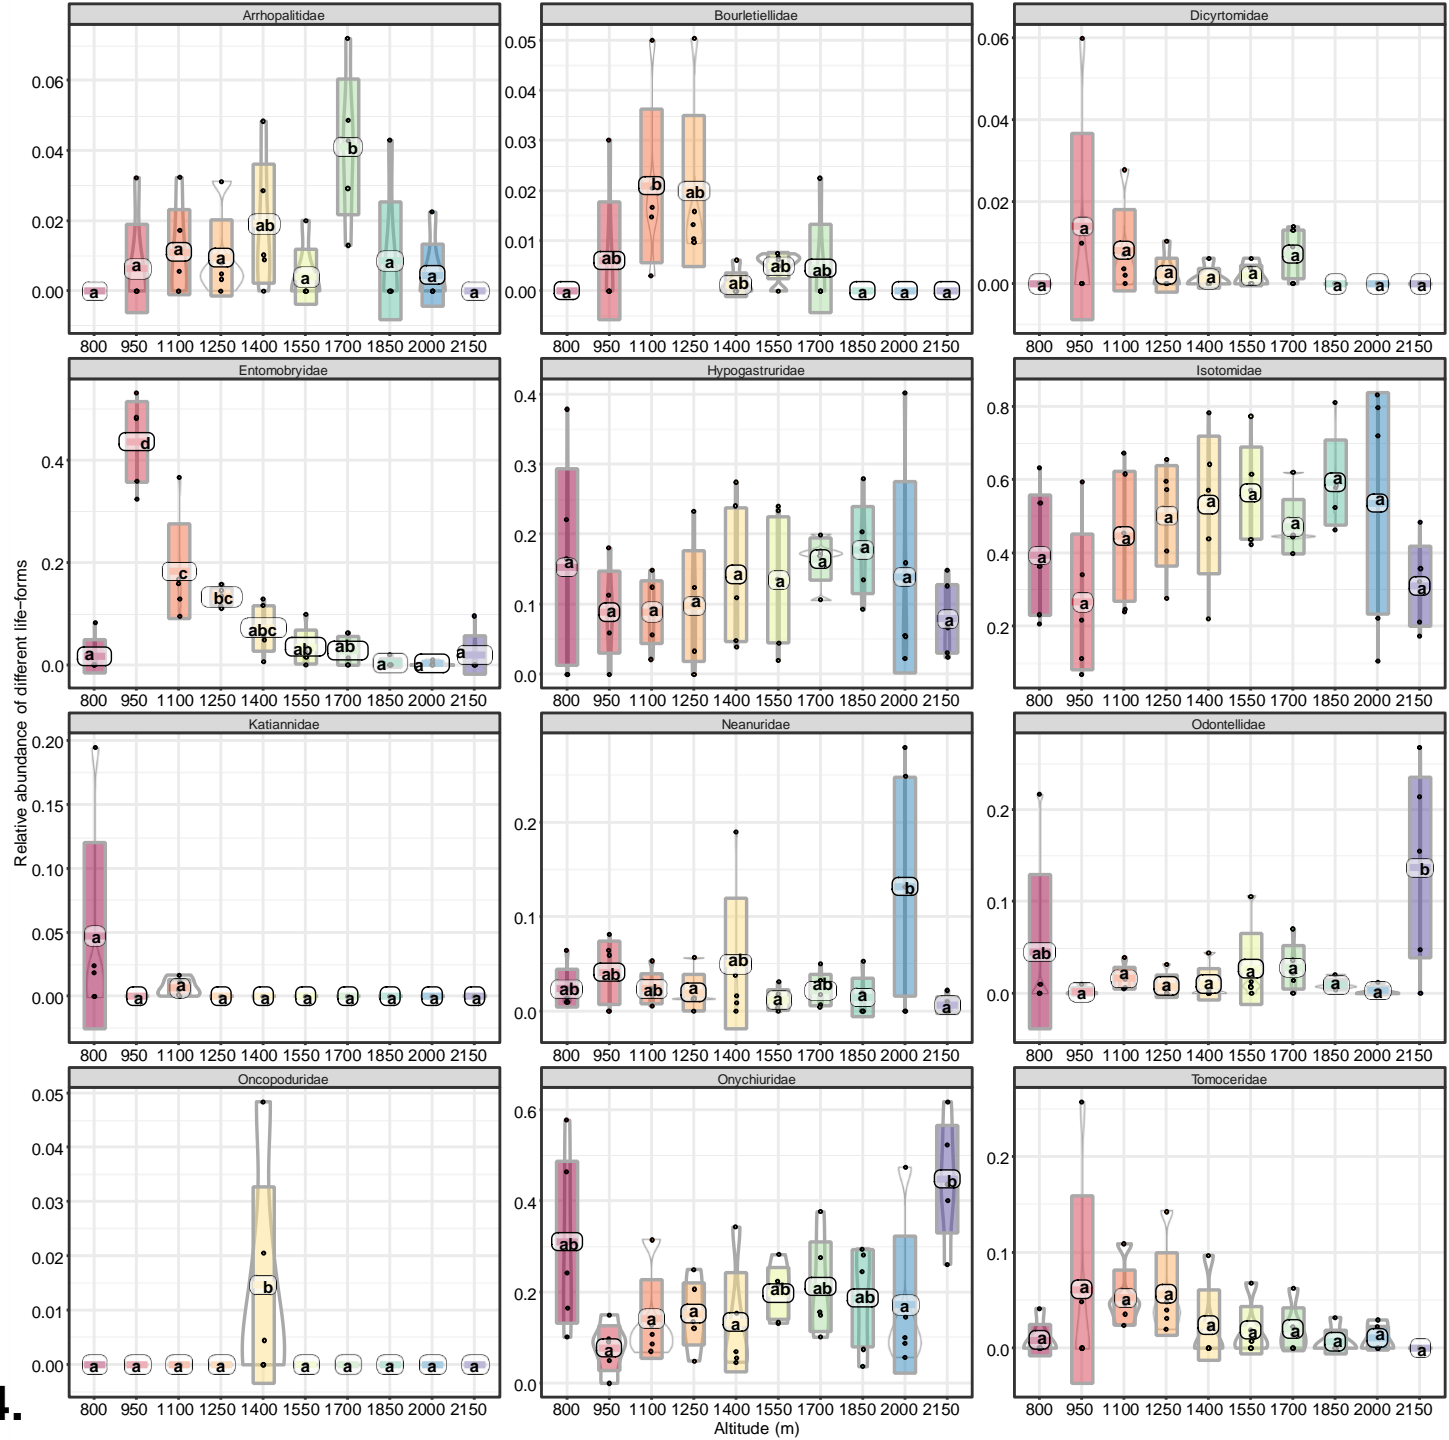

Figure S4.

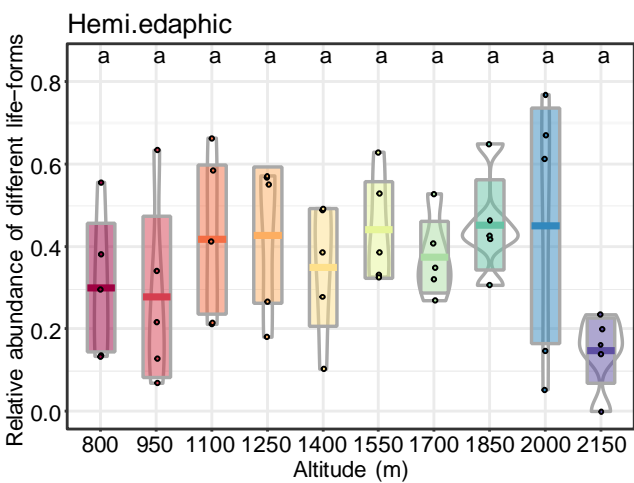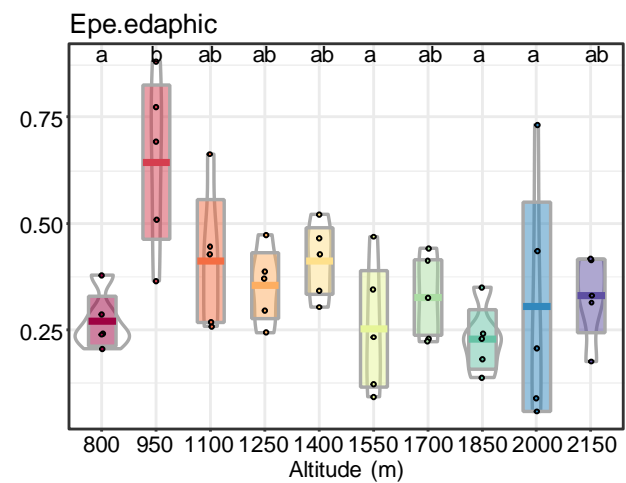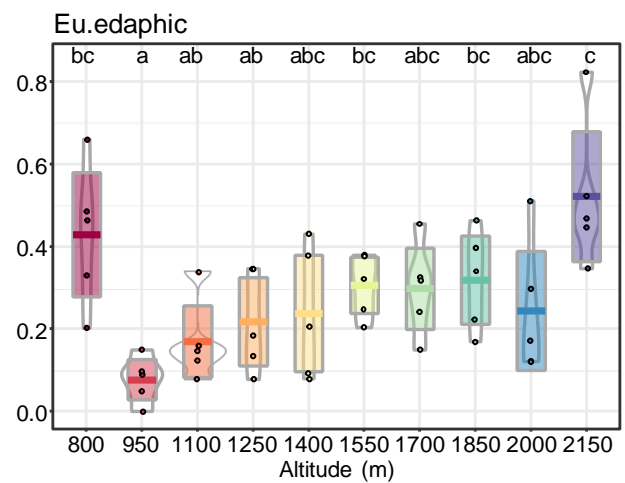

**Figure S5.**

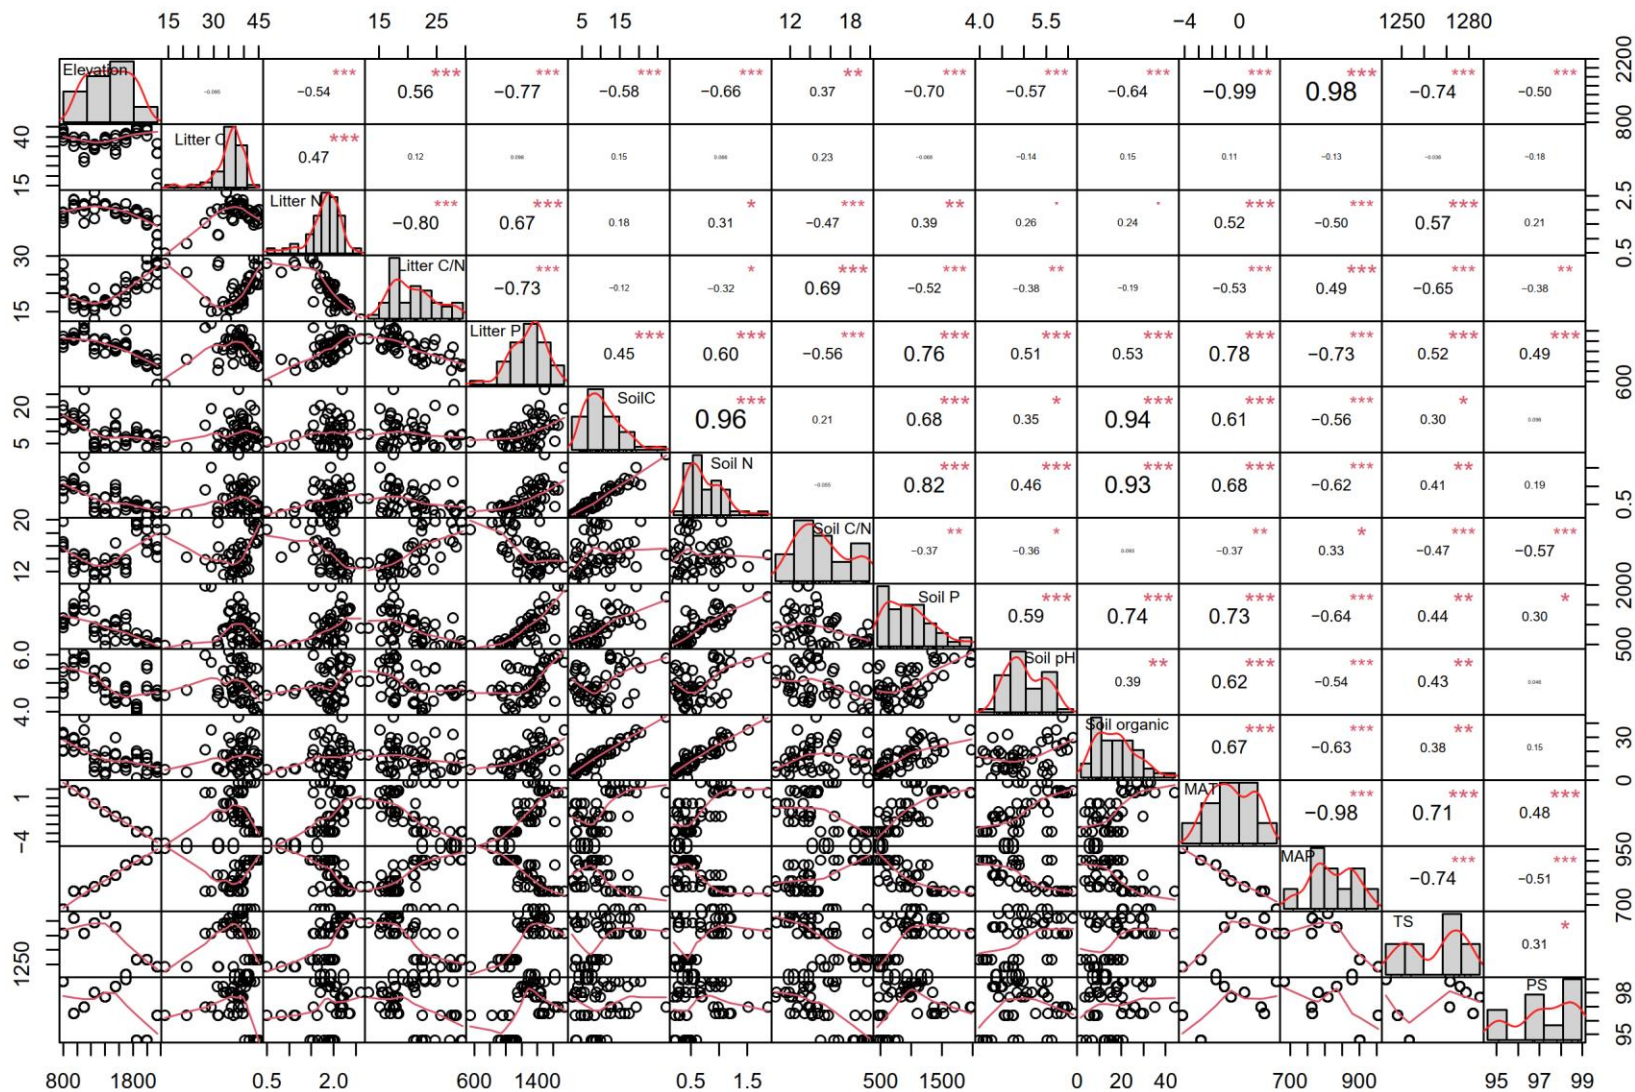

Figure S6.
